# Supplementary material
Source: publisher figshare collection journal article supplement (https://karger.figshare.com/articles/dataset/_/5126452)

**Figure S2:** Effect of Heart rate on right myocardial performance index (RMPI). Right ventricular heart rate is calculated as mean value of ‘a’HR and ‘b’HR.

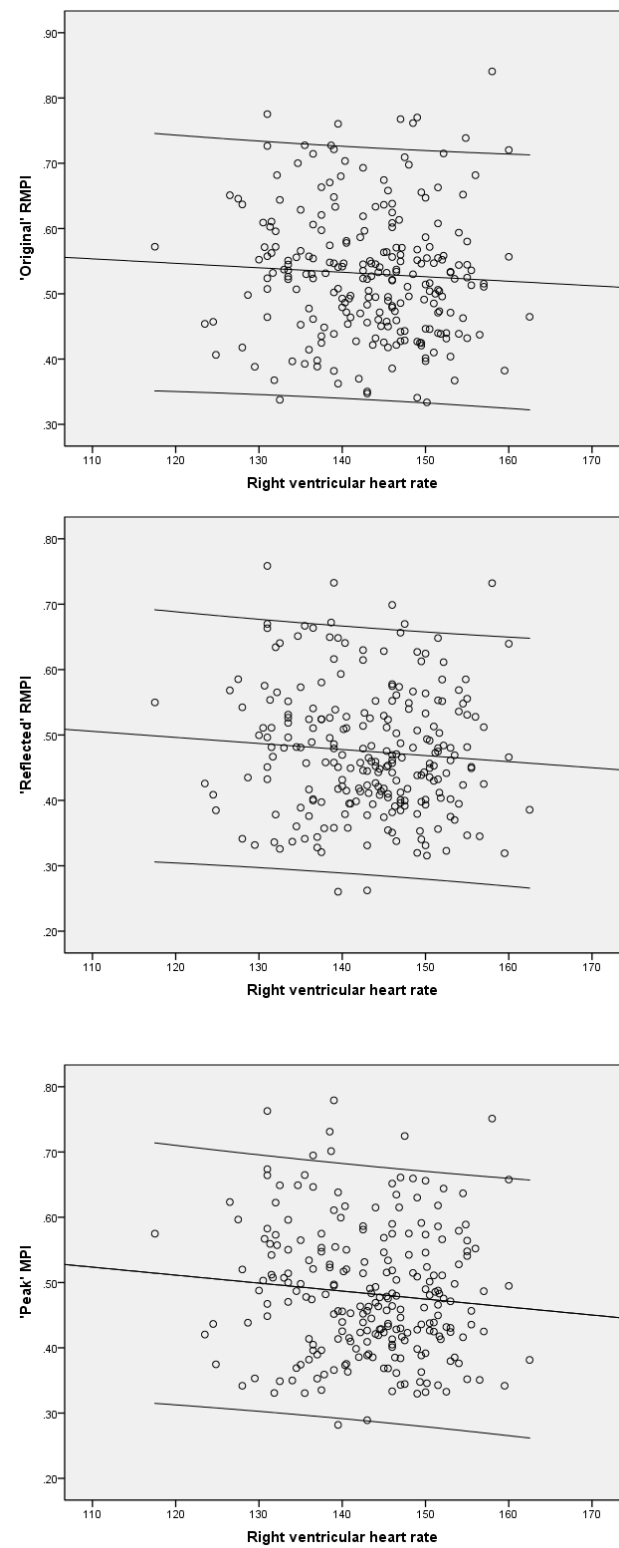

Supplement: Supplementary file 1 [file 1]
