# Supplementary material
Source: publisher figshare collection journal article supplement (https://karger.figshare.com/articles/dataset/_/5126452)

**Figure S1:** Effect of caliper position on the calculated RMPI time intervals showing plots of time interval values against weeks of gestation.

5<sup>th</sup> = 5<sup>th</sup> centile 50<sup>th</sup> = 50<sup>th</sup> centile 95<sup>th</sup> = 95<sup>th</sup> centile **a** = effect on “a” interval **b** = effect on “b” interval.

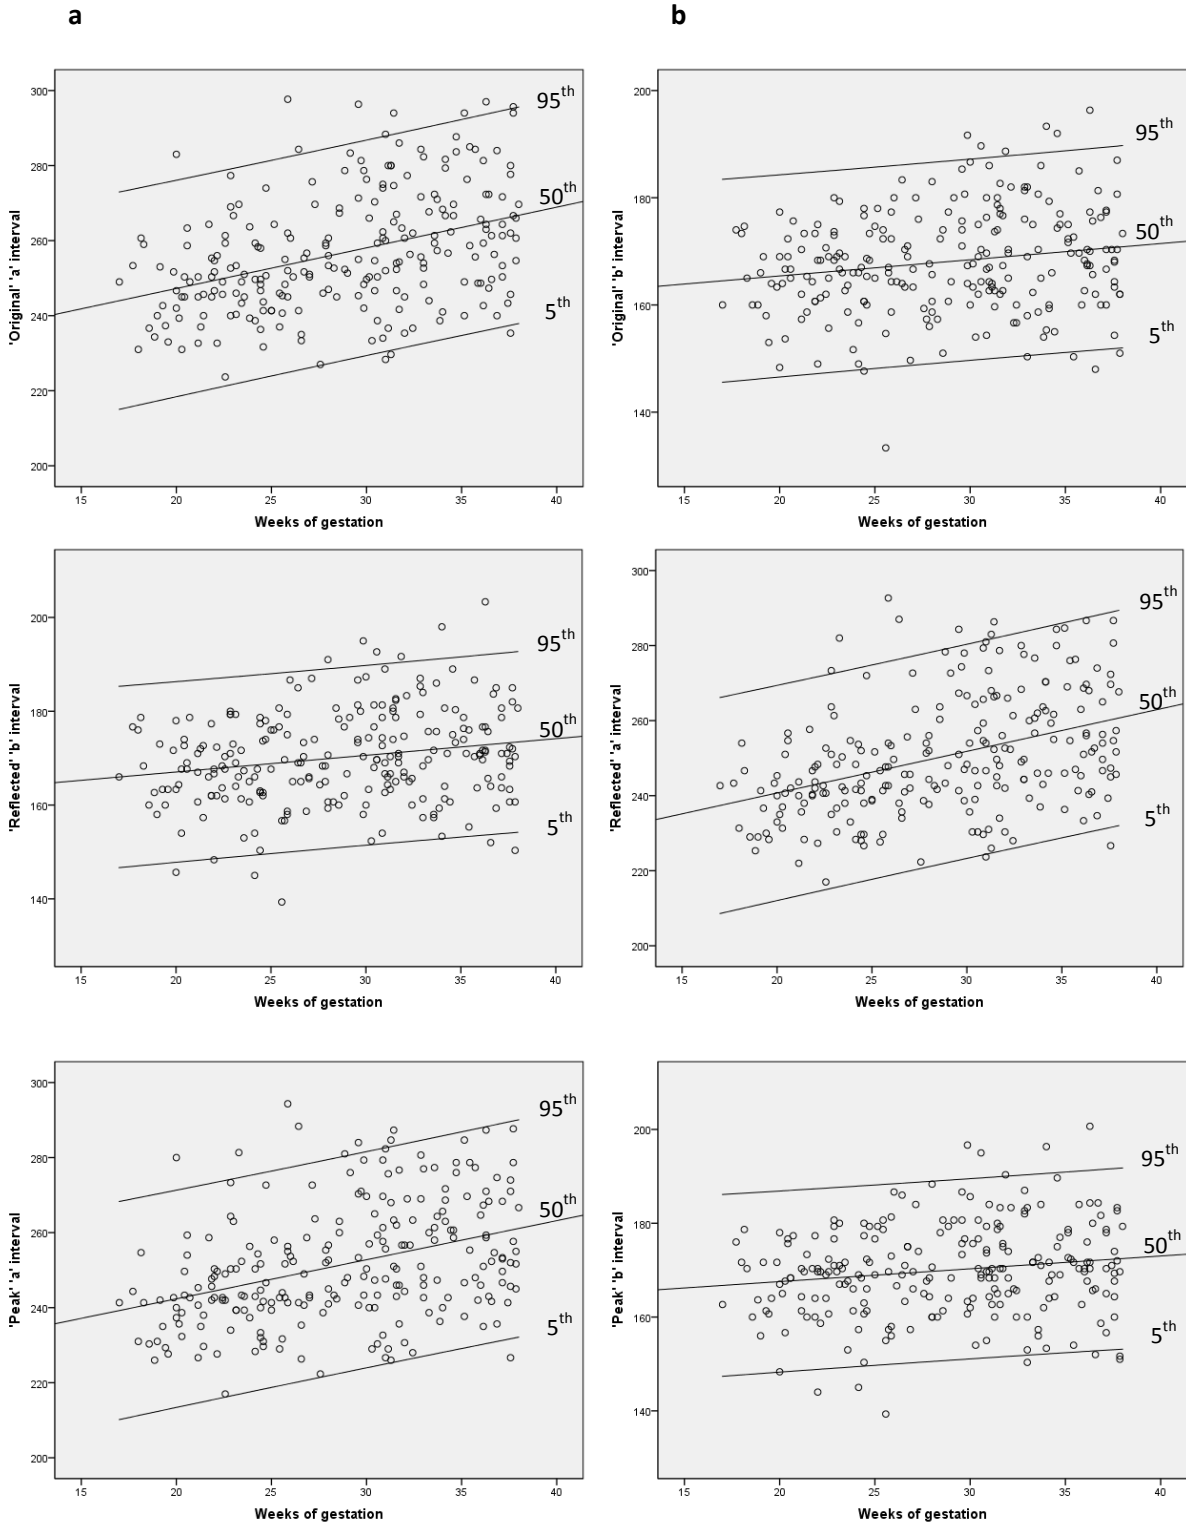

Supplement: Supplementary file 2 [file 1 › 000362388_sm_Figure_1.pdf]
